# Supplementary material for: Altered lipid homeostasis is associated with cerebellar neurodegeneration in SNX14 deficiency
Source: PubMed Central journal article supplement (PMC11141923; doi:10.1172/jci.insight.168594), 2024-04-16

Full unedited gel images for Figure 1A

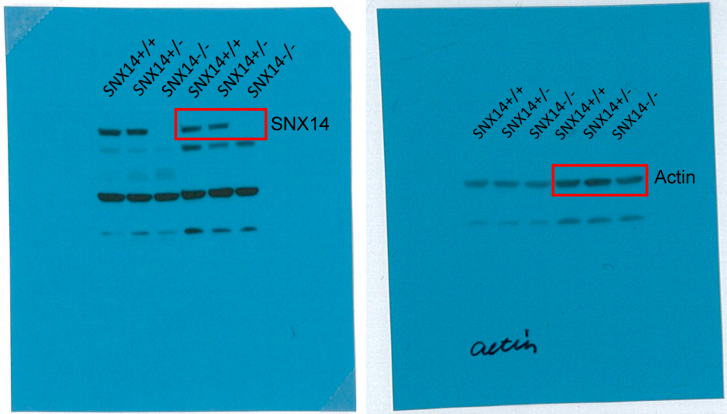

Full unedited gel images for Supplemental Figure 2A

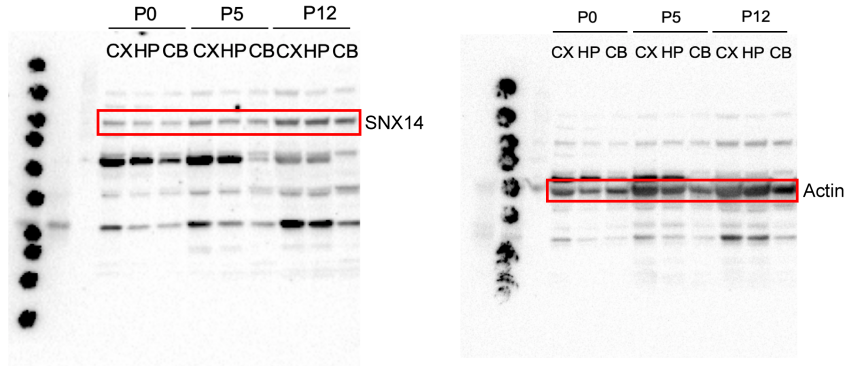

Full unedited gel images for Supplemental Figure 4E

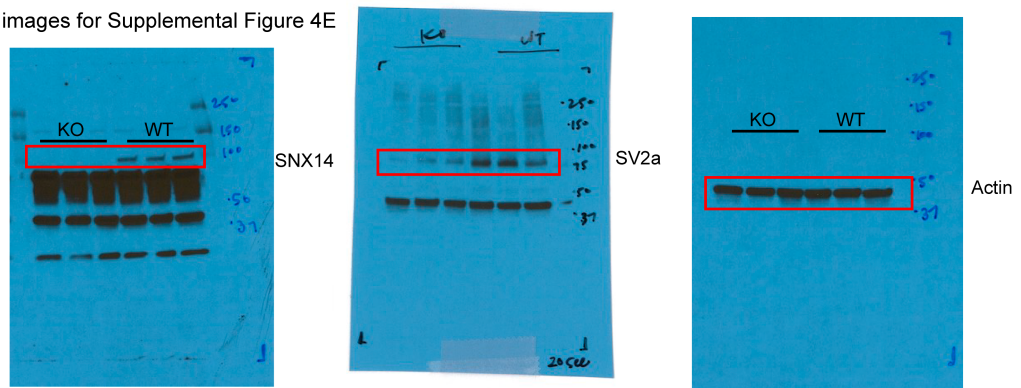

Supplement: jciinsight-9-168594-s191.pdf [file jciinsight-9-168594-s191.pdf]
