# Supplementary material for: Altered lipid homeostasis is associated with cerebellar neurodegeneration in SNX14 deficiency
Source: JCI Insight. 2024 Apr 16;9(10):e168594. doi: 10.1172/jci.insight.168594 (PMC11141923; doi:10.1172/jci.insight.168594)
Supplement: Supplemental data set 2 [file jciinsight-9-168594-s190.xlsx]

## Sheet: 1year_CX
Database	Term	Overlap	P.value	Adjusted.P.value	Old.P.value	Old.Adjusted.P.value	Odds.Ratio	Combined.Score	Genes	type	logAdjP
Biological Processes	Purine Ribonucleotide Metabolic Process	1/84	0.0125477	0.0125477	0	0	119.964	525.228	SULT1A1	up	-1.90144
Biological Processes	Oxoacid Metabolic Process	1/22	0.00329648	0.00376741	0	0	475.619	2718.11	SULT1A1	up	-2.42396
Biological Processes	Primary Alcohol Catabolic Process	1/9	0.00134943	0.00319754	0	0	1249.31	8255.55	SULT1A1	up	-2.49518
Biological Processes	Amine Metabolic Process	1/9	0.00134943	0.00319754	0	0	1249.31	8255.55	SULT1A1	up	-2.49518
Biological Processes	Purine Ribonucleoside Bisphosphate Metabolic Process	1/13	0.00194879	0.00319754	0	0	832.708	5196.55	SULT1A1	up	-2.49518
Biological Processes	Ethanol Metabolic Process	1/14	0.0020986	0.00319754	0	0	768.615	4739.66	SULT1A1	up	-2.49518
Biological Processes	3'-Phosphoadenosine 5'-Phosphosulfate Metabolic Process	1/15	0.00224839	0.00319754	0	0	713.679	4351.69	SULT1A1	up	-2.49518
Biological Processes	Sulfation	1/16	0.00239816	0.00319754	0	0	666.067	4018.42	SULT1A1	up	-2.49518
Molecular Function	Sulfotransferase Activity	1/38	0.00568939	0.00568939	0	0	269.73	1394.27	SULT1A1	up	-2.24493
Cellular Component	Exocytic Vesicle Membrane	3/53	9.9211e-05	0.00173126	0	0	38.5471	355.337	UNC13C;SV2C;SLC32A1	down	2.76164
Cellular Component	Synaptic Vesicle Membrane	3/54	0.000104925	0.00173126	0	0	37.7894	346.236	UNC13C;SV2C;SLC32A1	down	-2.76164
Descartes_Cell_Types	Islet endocrine cells in Pancreas	4/158	0.000144556	0.00520401	0	0	17.1532	151.666	NECAB2;GRM4;ECEL1;ISL1	down	-2.28366
Descartes_Cell_Types	Chromaffin cells in Adrenal	3/105	0.00074745	0.00947493	0	0	18.8463	135.672	SV2C;DCLK3;ISL1	down	-2.02342
Descartes_Cell_Types	Visceral neurons in Heart	3/107	0.000789577	0.00947493	0	0	18.482	132.036	NECAB2;ECEL1;ISL1	down	-2.02342
Descartes_Cell_Types	Erythroblasts in Heart	1/331	0.048835	0.048835	0	0	29.7985	89.9708	SULT1A1	up	-1.31127
Descartes_Cell_Types	Astrocytes in Cerebrum	1/190	0.0282313	0.042347	0	0	52.4021	186.935	ETNPPL	up	-1.37318
Descartes_Cell_Types	Parietal and chief cells in Stomach	1/41	0.00613763	0.0184129	0	0	249.463	1270.59	ETNPPL	up	-1.73488
DisGeNET	Attention deficit-hyperactivity	2/9	0.000100229	0.0287158	0	0	178.205	1640.92	LMO3;HTR1B	down	-1.54188
DisGeNET	Carcinoma of Male Breast	1/58	0.00867513	0.0437879	0	0	174.912	830.36	SULT1A1	up	-1.35865
DisGeNET	Bile duct carcinoma	1/61	0.00912248	0.0437879	0	0	166.142	780.37	SULT1A1	up	-1.35865
DisGeNET	High altitude pulmonary edema	1/33	0.00494202	0.0375131	0	0	311.953	1656.47	SULT1A1	up	-1.42582
DisGeNET	Cancer of Urinary Tract	1/34	0.00509152	0.0375131	0	0	302.485	1597.17	SULT1A1	up	-1.42582
DisGeNET	Infant Acute Lymphoblastic Leukemia	1/34	0.00509152	0.0375131	0	0	302.485	1597.17	SULT1A1	up	-1.42582
DisGeNET	Cervical intraepithelial neoplasia grade 1	1/37	0.00553994	0.0375131	0	0	277.236	1440.46	SULT1A1	up	-1.42582
DisGeNET	Genitourinary Cancer	1/41	0.00613763	0.0375131	0	0	249.463	1270.59	SULT1A1	up	-1.42582
DisGeNET	Cervical intraepithelial neoplasia grade 2	1/42	0.00628702	0.0375131	0	0	243.366	1233.69	SULT1A1	up	-1.42582
DisGeNET	Malignant neoplasm of male breast	1/46	0.0068844	0.0375131	0	0	221.689	1103.68	SULT1A1	up	-1.42582
DisGeNET	Carcinoma in situ of uterine cervix	1/47	0.00703371	0.0375131	0	0	216.859	1074.98	SULT1A1	up	-1.42582
DisGeNET	Slow acetylator due to N-acetyltransferase enzyme variant	1/21	0.0031468	0.0302093	0	0	499.425	2877.37	SULT1A1	up	-1.51986
DisGeNET	Genomic Instability	1/6	0.000899754	0.0271778	0	0	1999.2	14021.2	SULT1A1	up	-1.56579
DisGeNET	Cervical Squamous Cell Carcinoma In Situ	1/6	0.000899754	0.0271778	0	0	1999.2	14021.2	SULT1A1	up	-1.56579
DisGeNET	Female Genital Diseases	1/12	0.00179898	0.0271778	0	0	908.455	5741.92	SULT1A1	up	-1.56579
DisGeNET	Urologic Neoplasms	1/12	0.00179898	0.0271778	0	0	908.455	5741.92	SULT1A1	up	-1.56579
DisGeNET	Breast Neoplasms, Male	1/13	0.00194879	0.0271778	0	0	832.708	5196.55	SULT1A1	up	-1.56579
DisGeNET	Cervix Intraepithelial Neoplasia Grade 3 AJCC v7	1/15	0.00224839	0.0271778	0	0	713.679	4351.69	SULT1A1	up	-1.56579
DisGeNET	Cervical Squamous Intraepithelial Neoplasia 1	1/16	0.00239816	0.0271778	0	0	666.067	4018.42	SULT1A1	up	-1.56579
DisGeNET	Autosome Abnormalities	1/17	0.00254792	0.0271778	0	0	624.406	3729.25	SULT1A1	up	-1.56579
DisGeNET	Chromosome Aberrations	1/17	0.00254792	0.0271778	0	0	624.406	3729.25	SULT1A1	up	-1.56579

## Sheet: 1month_CB
Database	Term	Overlap	P.value	Adjusted.P.value	Old.P.value	Old.Adjusted.P.value	Odds.Ratio	Combined.Score	Genes	type	logAdjP
Biological Processes	Regulation Of Actin Filament Length	1/9	0.00134943	0.0101177	0	0	1249.31	8255.55	NEB	down	-1.99492
Biological Processes	Cardiac Myofibril Assembly	1/15	0.00224839	0.0101177	0	0	713.679	4351.69	NEB	down	-1.99492
Biological Processes	Regulation Of Cellular Component Size	1/43	0.00643638	0.0139073	0	0	237.56	1198.68	NEB	down	-1.85676
Biological Processes	Autophagosome Maturation	1/44	0.00658574	0.0139073	0	0	232.023	1165.42	SNX14	down	-1.85676
Biological Processes	Muscle Organ Development	1/58	0.00867513	0.0139073	0	0	174.912	830.36	NEB	down	-1.85676
Biological Processes	Protein-Containing Complex Disassembly	1/62	0.00927156	0.0139073	0	0	163.41	764.889	SNX14	down	-1.85676
Biological Processes	Regulation Of Actin Cytoskeleton Organization	1/91	0.0135885	0.0174596	0	0	110.594	475.393	NEB	down	-1.75797
Biological Processes	Macroautophagy	1/104	0.0155197	0.0174596	0	0	96.5728	402.288	SNX14	down	-1.75797
Biological Processes	Actin Filament Organization	1/144	0.0214458	0.0214458	0	0	69.4196	266.726	NEB	down	-1.66866
Molecular Function	Phosphatidylinositol-3,5-Bisphosphate Binding	1/24	0.00359581	0.0107874	0	0	434.217	2443.77	SNX14	down	-1.96708
Molecular Function	Phosphatidylinositol Bisphosphate Binding	1/93	0.0138858	0.0158165	0	0	108.179	462.671	SNX14	down	-1.80089
Molecular Function	Phosphatidylinositol Binding	1/106	0.0158165	0.0158165	0	0	94.7238	392.791	SNX14	down	-1.80089
Molecular Function	GABA-gated Chloride Ion Channel Activity	2/12	0.0035563	0.0278577	0	0	26.6295	150.165	GABRA5;GABRG3	up	-1.55505
Molecular Function	Outward Rectifier Potassium Channel Activity	2/10	0.00244889	0.0254509	0	0	33.2903	200.145	KCNT2;KCNIP2	up	-1.5943
Molecular Function	Extracellular Ligand-Gated Monoatomic Ion Channel Activity	2/10	0.00244889	0.0254509	0	0	33.2903	200.145	GABRA5;GABRG3	up	-1.5943
Molecular Function	Organic Acid:Sodium Symporter Activity	2/11	0.0029783	0.0254509	0	0	29.5899	172.107	SLC13A3;SLC6A13	up	-1.5943
Molecular Function	Prostaglandin Transmembrane Transporter Activity	2/11	0.0029783	0.0254509	0	0	29.5899	172.107	SLC22A6;SLC22A8	up	-1.5943
Molecular Function	Benzodiazepine Receptor Activity	2/9	0.00196885	0.023134	0	0	38.0479	237.05	GABRA5;GABRG3	up	-1.63575
Molecular Function	Phospholipase Inhibitor Activity	2/9	0.00196885	0.023134	0	0	38.0479	237.05	ANXA1;ANXA2	up	-1.63575
Molecular Function	Gamma-Aminobutyric Acid Transmembrane Transporter Activity	2/6	0.00083266	0.0176583	0	0	66.594	472.21	SLC6A13;SLC6A12	up	-1.75305
Molecular Function	G Protein-Coupled Serotonin Receptor Activity	3/21	0.000507785	0.0159106	0	0	22.3322	169.4	CHRM3;HTR1A;HTR2A	up	-1.79831
Molecular Function	Platelet-Derived Growth Factor Binding	3/10	4.86951e-05	0.00457734	0	0	57.4575	570.549	COL3A1;COL1A2;COL6A1	up	-2.33939
Cellular Component	GABA-A Receptor Complex	2/18	0.00800328	0.0499028	0	0	16.6384	80.3287	GABRA5;GABRG3	up	-1.30187
Cellular Component	Dense Core Granule	2/16	0.00633936	0.0419983	0	0	19.0173	96.2459	SYT5;CRHBP	up	-1.37677
Cellular Component	Supramolecular Fiber	3/36	0.00250944	0.0221667	0	0	12.172	72.8822	ELN;FBLN1;THSD4	up	-1.6543
Cellular Component	Platelet Alpha Granule Lumen	4/66	0.00156491	0.016588	0	0	8.68422	56.0995	ISLR;FN1;SERPING1;THBS1	up	-1.78021
Cellular Component	Extracellular Vesicle	4/60	0.00109646	0.0145281	0	0	9.61759	65.5503	OLFML3;COL6A2;COL12A1;COL6A3	up	-1.83779
Cellular Component	Extracellular Membrane-Bounded Organelle	4/57	0.000903859	0.013687	0	0	10.1635	71.2345	OLFML3;COL6A2;COL12A1;COL6A3	up	-1.86369
Cellular Component	Dendrite	10/270	4.01511e-05	0.001064	0	0	5.34343	54.0908	EPHA5;CHRM3;CRHBP;GABRA5;HTR1A;KLHL1;COBL;HTR2A;GABRG3;CNIH3	up	-2.97306
Cellular Component	Endoplasmic Reticulum Lumen	16/284	4.93047e-10	2.61315e-08	0	0	8.65937	185.574	ITIH2;IGFBP4;COL25A1;COL12A1;FN1;THBS1;FSTL1;COL1A1;BMP4;COL3A1;COL1A2;COL6A2;COL5A2;COL6A1;SERPING1;COL6A3	up	-7.58284
Cellular Component	Collagen-Containing Extracellular Matrix	28/373	4.00665e-20	4.24705e-18	0	0	12.8694	574.795	ITIH2;TNXB;ELN;COL12A1;FBLN1;AEBP1;THBS1;THSD4;VTN;EFEMP1;CCN2;ANXA1;ANXA2;COL25A1;FIBCD1;FN1;DCN;COL1A1;SMOC2;COL3A1;COL1A2;COL6A2;SMOC1;COL5A2;COL6A1;SERPING1;COL6A3;FMOD	up	-17.3719
Descartes_Cell_Types	Skeletal muscle cells in Eye	1/213	0.0316123	0.0355713	0	0	46.6627	161.183	NEB	down	-1.4489
Descartes_Cell_Types	Skeletal muscle cells in Muscle	1/240	0.0355713	0.0355713	0	0	41.3347	137.902	NEB	down	-1.4489
Descartes_Cell_Types	Retinal pigment cells in Eye	7/94	7.18852e-06	8.43017e-05	0	0	11.042	130.771	SLC22A6;CRISPLD1;SLC6A13;SLC6A12;SLC26A7;PTGDS;SLC22A8	up	-4.07416
Descartes_Cell_Types	Stromal cells in Stomach	6/51	2.28125e-06	3.2698e-05	0	0	18.2106	236.57	COL1A1;COL3A1;COL6A3;FBLN1;PI16;DCN	up	-4.48548
Descartes_Cell_Types	Stromal cells in Heart	6/34	1.89338e-07	3.05307e-06	0	0	29.2921	453.434	COL1A1;ISLR;COL1A2;ABCA9;FBLN1;DCN	up	-5.51526
Descartes_Cell_Types	Vascular endothelial cells in Cerebellum	20/597	2.51686e-08	4.63821e-07	0	0	5.09929	89.2257	IFITM3;FOXC1;IFITM2;ANXA1;TNXB;IGFBP4;SLC6A13;FN1;SLC6A12;SLC7A11;UACA;FSTL1;THBD;COL3A1;VSIG2;ANPEP;COL6A2;ALX4;VIP;KCNJ2	up	-6.33365
Descartes_Cell_Types	Stromal cells in Adrenal	12/145	1.05364e-09	2.26534e-08	0	0	12.7977	264.542	BMP4;COL1A1;ISLR;COL3A1;OSR1;PDE1A;ADAMTSL3;COL12A1;COL6A3;PI16;FMOD;DCN	up	-7.64487
Descartes_Cell_Types	Vascular endothelial cells in Cerebrum	21/536	6.82513e-10	1.76088e-08	0	0	6.06444	127.991	IFITM3;FOXC1;ANXA1;TNXB;IGFBP4;SLC6A13;FN1;ABCA9;SLC6A12;UACA;FSTL1;DCN;THBD;TBX15;COL3A1;COL1A2;ANPEP;COL6A2;SERPING1;ALX4;KCNJ2	up	-7.75427
Descartes_Cell_Types	Stromal cells in Kidney	13/167	4.43062e-10	1.42887e-08	0	0	12.0476	259.472	OSR1;COL12A1;OMD;FOXP2;DCN;COL1A1;TBX15;ISLR;COL3A1;COL1A2;ADAMTSL3;FIBIN;PI16	up	-7.84501
Descartes_Cell_Types	Stromal cells in Muscle	13/94	2.73235e-13	1.17491e-11	0	0	22.9902	665.07	TNXB;OSR1;COL12A1;SHOX2;FBLN1;DCN;MRC2;COL1A1;SMOC2;ISLR;COL3A1;COL1A2;PI16	up	-10.93
Descartes_Cell_Types	Stromal cells in Thymus	20/282	3.93267e-14	2.53657e-12	0	0	11.4137	352.304	ELN;COL12A1;FBLN1;FSTL1;DCN;COL1A1;MRC2;ISLR;COL3A1;COL1A2;LHX2;OLFML3;ADAMTSL3;COL5A2;COL6A1;SERPING1;PI16;FMOD;CTXN1;ZBTB7C	up	-11.5958
Descartes_Cell_Types	Stromal cells in Eye	15/95	4.77959e-16	6.16567e-14	0	0	27.2551	961.477	COL12A1;OMD;FN1;THBS1;DCN;COL1A1;ISLR;COL3A1;COL1A2;COL6A2;COL6A1;COL5A2;COL6A3;PI16;FMOD	up	-13.21
DisGeNET	Progressive proximal muscle weakness_down	1/6	0.000899754	0.0162166	0	0	1999.2	14021.2	NEB	down	-1.79004
DisGeNET	Nemaline Myopathy, Autosomal Recessive_down	1/7	0.00104966	0.0162166	0	0	1665.92	11427	NEB	down	-1.79004
DisGeNET	Nemaline Myopathy, Childhood Onset_down	1/8	0.00119955	0.0162166	0	0	1427.86	9603.49	NEB	down	-1.79004
DisGeNET	Pain in limb_down	1/8	0.00119955	0.0162166	0	0	1427.86	9603.49	NEB	down	-1.79004
DisGeNET	Broad philtrum_down	1/9	0.00134943	0.0162166	0	0	1249.31	8255.55	SNX14	down	-1.79004
DisGeNET	MULTIPLE PTERYGIUM SYNDROME, LETHAL TYPE_down	1/9	0.00134943	0.0162166	0	0	1249.31	8255.55	NEB	down	-1.79004
DisGeNET	Neck flexor weakness_down	1/10	0.00149929	0.0162166	0	0	1110.44	7220.95	NEB	down	-1.79004
DisGeNET	Type 1 muscle fiber predominance_down	1/11	0.00164914	0.0162166	0	0	999.35	6403.33	NEB	down	-1.79004
DisGeNET	Hypersensitive syndrome_down	1/11	0.00164914	0.0162166	0	0	999.35	6403.33	SNX14	down	-1.79004
DisGeNET	Nemaline bodies_down	1/11	0.00164914	0.0162166	0	0	999.35	6403.33	NEB	down	-1.79004
DisGeNET	Broad face_down	1/13	0.00194879	0.0176891	0	0	832.708	5196.55	SNX14	down	-1.7523
DisGeNET	Slender build_down	1/16	0.00239816	0.0198863	0	0	666.067	4018.42	NEB	down	-1.70145
DisGeNET	Abnormality of the rib cage_down	1/18	0.00269766	0.0198863	0	0	587.647	3476.15	NEB	down	-1.70145
DisGeNET	EMG: neuropathic changes_down	1/21	0.0031468	0.0198863	0	0	499.425	2877.37	NEB	down	-1.70145
DisGeNET	Relative macrocephaly_down	1/22	0.00329648	0.0198863	0	0	475.619	2718.11	SNX14	down	-1.70145
DisGeNET	Myopathic facies_down	1/22	0.00329648	0.0198863	0	0	475.619	2718.11	NEB	down	-1.70145
DisGeNET	Hydrops Fetalis, Non-Immune_down	1/24	0.00359581	0.0198863	0	0	434.217	2443.77	NEB	down	-1.70145
DisGeNET	Spinal rigidity_down	1/24	0.00359581	0.0198863	0	0	434.217	2443.77	NEB	down	-1.70145
DisGeNET	Frequent falls_down	1/25	0.00374545	0.0198863	0	0	416.104	2324.86	NEB	down	-1.70145
DisGeNET	Congenital contracture_down	1/26	0.00389507	0.0198863	0	0	399.44	2216.11	NEB	down	-1.70145
DisGeNET	Mildly elevated creatine phosphokinase_down	1/27	0.00404468	0.0198863	0	0	384.058	2116.29	NEB	down	-1.70145
DisGeNET	Bulbar palsy_down	1/27	0.00404468	0.0198863	0	0	384.058	2116.29	NEB	down	-1.70145
DisGeNET	Bulbar weakness_down	1/29	0.00434385	0.020503	0	0	356.589	1939.49	NEB	down	-1.68818
DisGeNET	Muscle weakness of limb_down	1/31	0.00464296	0.0208271	0	0	332.783	1787.85	NEB	down	-1.68137
DisGeNET	Myopathies, Nemaline_down	1/32	0.0047925	0.0208271	0	0	322.032	1719.88	NEB	down	-1.68137
DisGeNET	Vipoma_up	2/6	0.00083266	0.0140096	0	0	66.594	472.21	SST;VIP	up	-1.85357
DisGeNET	Type 1 muscle fiber predominance_up	3/11	6.65852e-05	0.00244066	0	0	50.2728	483.475	COL6A2;COL6A1;COL6A3	up	-2.61249
DisGeNET	Poor wound healing_up	3/10	4.86951e-05	0.00197694	0	0	57.4575	570.549	COL1A1;COL1A2;COL5A2	up	-2.70401
DisGeNET	Pancreatic Cholera_up	3/9	3.42763e-05	0.00159904	0	0	67.0372	689.213	SST;TAC1;VIP	up	-2.79614
DisGeNET	Muscle fiber necrosis_up	3/8	2.29781e-05	0.00126339	0	0	80.4486	859.269	COL6A2;COL6A1;COL6A3	up	-2.89846
DisGeNET	Bowel diverticula_up	3/7	1.44413e-05	0.000880426	0	0	100.566	1120.85	COL1A1;ELN;COL5A2	up	-3.05531
DisGeNET	Bowel diverticulosis_up	3/7	1.44413e-05	0.000880426	0	0	100.566	1120.85	COL1A1;ELN;COL5A2	up	-3.05531
DisGeNET	Molluscoid pseudotumors_up	3/7	1.44413e-05	0.000880426	0	0	100.566	1120.85	COL1A1;COL3A1;COL5A2	up	-3.05531
DisGeNET	Nocturnal hypoventilation_up	3/7	1.44413e-05	0.000880426	0	0	100.566	1120.85	COL6A2;COL6A1;COL6A3	up	-3.05531
DisGeNET	Cigarette-paper scars_up	3/6	8.29815e-06	0.000774243	0	0	134.095	1568.84	COL1A1;COL3A1;COL5A2	up	-3.11112
DisGeNET	Urinary Stress Incontinence_up	4/15	3.99463e-06	0.000439267	0	0	49.0736	610.012	COL1A1;ELN;FMOD;DCN	up	-3.35727
DisGeNET	Valgus deformities of feet_up	4/13	2.11719e-06	0.000260753	0	0	59.9849	783.728	COL6A2;COL12A1;COL6A1;COL6A3	up	-3.58377
DisGeNET	Bethlem myopathy_up	4/13	2.11719e-06	0.000260753	0	0	59.9849	783.728	COL6A2;COL12A1;COL6A1;COL6A3	up	-3.58377
DisGeNET	Long toe_up	4/13	2.11719e-06	0.000260753	0	0	59.9849	783.728	COL6A2;COL12A1;COL6A1;COL6A3	up	-3.58377
DisGeNET	Slender finger_up	4/12	1.4744e-06	0.000226984	0	0	67.4864	906.157	COL6A2;COL6A1;COL12A1;COL6A3	up	-3.64401
DisGeNET	Congenital torticollis_up	4/11	9.88734e-07	0.000169129	0	0	77.1312	1066.48	COL6A2;ELN;COL6A1;COL6A3	up	-3.77178
DisGeNET	Ehlers-Danlos Syndrome, Type IV_up	4/8	2.13468e-07	4.69476e-05	0	0	135	2073.57	COL1A1;COL3A1;COL1A2;TNXB	up	-4.32839
DisGeNET	Diaphragmatic paresis_up	4/8	2.13468e-07	4.69476e-05	0	0	135	2073.57	COL6A2;COL6A1;COL12A1;COL6A3	up	-4.32839
DisGeNET	Diminished diaphragmatic motion_up	4/8	2.13468e-07	4.69476e-05	0	0	135	2073.57	COL6A2;COL6A1;COL12A1;COL6A3	up	-4.32839
DisGeNET	Ehlers-Danlos syndrome type 1_up	4/7	1.07364e-07	4.06465e-05	0	0	180.009	2888.61	COL1A1;COL3A1;COL1A2;COL5A2	up	-4.39098
DisGeNET	Increased endomysial connective tissue_up	4/7	1.07364e-07	4.06465e-05	0	0	180.009	2888.61	COL6A2;COL6A1;COL12A1;COL6A3	up	-4.39098
DisGeNET	Scleroatonic muscular dystrophy_up	5/17	1.32012e-07	4.06465e-05	0	0	56.6124	896.762	COL6A2;COL12A1;COL6A1;FN1;COL6A3	up	-4.39098
DisGeNET	Soft skin_up	6/20	5.95319e-09	4.58247e-06	0	0	58.6256	1110.33	COL1A1;COL3A1;TNXB;COL1A2;ELN;COL5A2	up	-5.3389
DisGeNET	Velvety skin_up	6/20	5.95319e-09	4.58247e-06	0	0	58.6256	1110.33	COL1A1;COL3A1;TNXB;COL1A2;ELN;COL5A2	up	-5.3389
DisGeNET	Ehlers-Danlos Syndrome_up	13/105	1.17991e-12	3.63296e-09	0	0	20.2301	555.631	TNXB;ELN;COL12A1;FN1;AEBP1;DCN;COL1A1;COL3A1;COL1A2;COL6A2;COL5A2;COL6A1;COL6A3	up	-8.43974

## Sheet: 1year_CB
Database	Term	Overlap	P.value	Adjusted.P.value	Old.P.value	Old.Adjusted.P.value	Odds.Ratio	Combined.Score	Genes	type	logAdjP
Biological Processes	Purine Ribonucleotide Metabolic Process	1/84	0.0125477	0.0125477	0	0	119.964	525.228	SULT1A1	up	-1.90144
Biological Processes	Oxoacid Metabolic Process	1/22	0.00329648	0.00376741	0	0	475.619	2718.11	SULT1A1	up	-2.42396
Biological Processes	Primary Alcohol Catabolic Process	1/9	0.00134943	0.00319754	0	0	1249.31	8255.55	SULT1A1	up	-2.49518
Biological Processes	Amine Metabolic Process	1/9	0.00134943	0.00319754	0	0	1249.31	8255.55	SULT1A1	up	-2.49518
Biological Processes	Purine Ribonucleoside Bisphosphate Metabolic Process	1/13	0.00194879	0.00319754	0	0	832.708	5196.55	SULT1A1	up	-2.49518
Biological Processes	Ethanol Metabolic Process	1/14	0.0020986	0.00319754	0	0	768.615	4739.66	SULT1A1	up	-2.49518
Biological Processes	3'-Phosphoadenosine 5'-Phosphosulfate Metabolic Process	1/15	0.00224839	0.00319754	0	0	713.679	4351.69	SULT1A1	up	-2.49518
Biological Processes	Sulfation	1/16	0.00239816	0.00319754	0	0	666.067	4018.42	SULT1A1	up	-2.49518
Molecular Function	Glutamate Receptor Binding	4/18	2.40906e-05	0.00628766	0	0	29.6051	314.811	CAMK2A;HOMER3;SHANK2;SHISA6	down	-2.20151
Cellular Component	Postsynaptic Density	10/151	2.34736e-06	0.000158459	0	0	7.53843	97.7148	GRIA1;GRID2;DLG2;DAGLA;HOMER3;INSYN1;GRIK1;KALRN;SHANK2;SHISA6	down	-3.80008
Cellular Component	Postsynaptic Density Membrane	5/34	1.85077e-05	0.000820507	0	0	17.9456	195.559	GRIA1;GRID2;DAGLA;DLG2;GRIK1	down	-3.08592
Cellular Component	Dendritic Spine Membrane	3/7	3.10361e-05	0.000860429	0	0	77.3477	802.896	GRIA1;DAGLA;SHISA6	down	-3.06529
Cellular Component	Postsynaptic Specialization Membrane	5/38	3.23469e-05	0.000860429	0	0	15.7671	163.016	GRIA1;GRID2;DAGLA;DLG2;GRIK1	down	-3.06529
Cellular Component	Sarcoplasmic Reticulum	5/45	7.4502e-05	0.0012386	0	0	13.0033	123.592	RYR1;CMYA5;ATP2A3;ITPR1;CASQ2	down	-2.90707
Cellular Component	Ionotropic Glutamate Receptor Complex	4/33	0.000287344	0.00382167	0	0	14.2813	116.461	GRIA1;GRID2;GRIK1;SHISA6	down	-2.41775
Cellular Component	Junctional Sarcoplasmic Reticulum Membrane	2/8	0.00254778	0.0205325	0	0	34.1952	204.232	RYR1;CASQ2	down	-1.68756
Cellular Component	Platelet Dense Tubular Network Membrane	2/8	0.00254778	0.0205325	0	0	34.1952	204.232	ATP2A3;ITPR1	down	-1.68756
Cellular Component	Platelet Dense Tubular Network	2/10	0.0040424	0.0268819	0	0	25.6438	141.321	ATP2A3;ITPR1	down	-1.57054
Cellular Component	Vacuolar Lumen	7/161	0.000128874	0.0078613	0	0	6.83831	61.2485	CD74;SDC4;NCAN;NAPRT;PADI2;FMOD;PRDX6	up	-2.10451
Cellular Component	Collagen-Containing Extracellular Matrix	21/373	1.28832e-13	1.57175e-11	0	0	9.94828	295.268	VIT;ITIH5;C1QB;C1QA;SERPINE2;MYOC;PLAT;THBS2;FBLN5;AGT;COL1A1;VTN;EFEMP1;SLPI;CCN2;MXRA7;APOE;TGFBI;FMOD;CBLN4;C1QC	up	-10.8036
Descartes_Cell_Types	Purkinje neurons in Cerebellum	8/74	6.14836e-07	4.90374e-05	0	0	12.7947	182.988	ARHGEF33;PRMT8;ANKRD33B;CALB1;SKOR2;ITPR1;SLC1A6;FOXP2	down	-4.30947
Descartes_Cell_Types	SKOR2 NPSR1 positive cells in Cerebrum	8/78	9.25234e-07	4.90374e-05	0	0	12.0611	167.568	ARHGEF33;PRMT8;PCP4;CALB1;LINGO3;SKOR2;TRPC3;ITPR1	down	-4.30947
Descartes_Cell_Types	Stromal cells in Stomach	3/51	0.00525579	0.029958	0	0	9.17315	48.1446	COL1A1;INHBA;CXCL14	up	-1.52349
Descartes_Cell_Types	Myeloid cells in Kidney	7/209	0.000628214	0.00895204	0	0	5.20067	38.3426	C1QB;C1QA;SPP1;TREM2;CD68;MPEG1;C1QC	up	-2.04808
Descartes_Cell_Types	Myeloid cells in Adrenal	7/179	0.000247554	0.00403159	0	0	6.11708	50.7955	C1QB;C1QA;SPP1;TREM2;CD68;MPEG1;C1QC	up	-2.39452
Descartes_Cell_Types	Microglia in Eye	9/240	4.4447e-05	0.000844493	0	0	5.92902	59.416	C1QB;C1QA;CD74;NRROS;STAB1;SPP1;MPEG1;AGT;C1QC	up	-3.0734
Descartes_Cell_Types	Microglia in Cerebellum	15/606	1.96208e-05	0.000447354	0	0	3.97652	43.1012	C1QB;C1QA;CD74;NRROS;ARRDC2;ACSM5;TREM2;MPEG1;TYROBP;GPNMB;SPP1;APOE;FCGR2B;CD68;C1QC	up	-3.34935
Descartes_Cell_Types	Antigen presenting cells in Thymus	9/209	1.49763e-05	0.000426823	0	0	6.85884	76.1951	C1QB;IGHM;C1QA;CD74;TYROBP;IGKC;TMEM176B;CD68;MPEG1	up	-3.36975
Descartes_Cell_Types	Myeloid cells in Stomach	7/90	2.96335e-06	0.000112607	0	0	12.7337	162.089	C1QB;C1QA;CD74;TYROBP;NR4A3;MPEG1;C1QC	up	-3.94843
Descartes_Cell_Types	Myeloid cells in Heart	9/134	3.83496e-07	2.18592e-05	0	0	11.016	162.75	C1QB;C1QA;CD74;TYROBP;SPP1;PADI2;TREM2;MPEG1;C1QC	up	-4.66036
Descartes_Cell_Types	Myeloid cells in Placenta	10/159	1.56881e-07	1.78845e-05	0	0	10.3361	161.944	C1QB;C1QA;CD74;TYROBP;STAB1;SPP1;PADI2;MPEG1;HS3ST2;C1QC	up	-4.74752
DisGeNET	Spinocerebellar Ataxia Type 5	7/46	2.91743e-07	0.000448659	0	0	18.871	283.959	PRKCG;GRID2;TRPC3;SNX14;SLC1A6;CACNA1G;SPTBN2	down	-3.34808
DisGeNET	Spinocerebellar Ataxia Type 6 (disorder)	7/48	3.94772e-07	0.000448659	0	0	17.9486	264.652	PRKCG;GRID2;CALB1;TRPC3;SNX14;CACNA1G;SPTBN2	down	-3.34808
DisGeNET	Spinocerebellar Ataxia Type 2	7/55	1.02714e-06	0.00077823	0	0	15.3257	211.322	PRKCG;GRID2;TRPC3;SNX14;RGS8;CACNA1G;SPTBN2	down	-3.10889
DisGeNET	Spinocerebellar Ataxia Type 4	6/37	1.43766e-06	0.000816951	0	0	20.2499	272.411	PRKCG;GRID2;TRPC3;SNX14;CACNA1G;SPTBN2	down	-3.0878
DisGeNET	Spinocerebellar Ataxia Type 7	7/72	6.48419e-06	0.00294771	0	0	11.3077	135.083	PRKCG;PCP2;GRID2;TRPC3;SNX14;CACNA1G;SPTBN2	down	-2.53051
DisGeNET	Spinocerebellar Ataxia Type 1	6/79	0.000122439	0.046384	0	0	8.581	77.2967	PRKCG;GRID2;TRPC3;SNX14;CACNA1G;SPTBN2	down	-1.33363
DisGeNET	Senile Paranoid Dementia	2/9	0.0016484	0.0220938	0	0	41.7122	267.29	TREM2;CP	up	-1.65573
DisGeNET	Keratitis, Herpetic	2/9	0.0016484	0.0220938	0	0	41.7122	267.29	APOE;SLC7A2	up	-1.65573
DisGeNET	Spinal Cord Contusion	2/9	0.0016484	0.0220938	0	0	41.7122	267.29	CASP3;AQP4	up	-1.65573
DisGeNET	Spinal Cord Injuries	2/9	0.0016484	0.0220938	0	0	41.7122	267.29	CASP3;AQP4	up	-1.65573
DisGeNET	Aphasia, Progressive	2/8	0.00128791	0.0194102	0	0	48.6667	323.864	PLAT;APOE	up	-1.71197
DisGeNET	Ehlers-Danlos Syndrome, Type IV	2/8	0.00128791	0.0194102	0	0	48.6667	323.864	COL1A1;ADGRG1	up	-1.71197
DisGeNET	Sensory denervation disorder	2/8	0.00128791	0.0194102	0	0	48.6667	323.864	CASP3;APOE	up	-1.71197
DisGeNET	Sinus Thrombosis, Intracranial	2/8	0.00128791	0.0194102	0	0	48.6667	323.864	CBS;F3	up	-1.71197
DisGeNET	Embolism and Thrombosis	2/8	0.00128791	0.0194102	0	0	48.6667	323.864	CBS;PLAT	up	-1.71197
DisGeNET	Glaucoma of childhood	2/8	0.00128791	0.0194102	0	0	48.6667	323.864	GJA1;MYOC	up	-1.71197
DisGeNET	Absent axillary hair	2/7	0.000970317	0.0167023	0	0	58.4029	405.193	GJB6;APOE	up	-1.77722
DisGeNET	Bowel diverticula	2/7	0.000970317	0.0167023	0	0	58.4029	405.193	COL1A1;FBLN5	up	-1.77722
DisGeNET	Bowel diverticulosis	2/7	0.000970317	0.0167023	0	0	58.4029	405.193	COL1A1;FBLN5	up	-1.77722
DisGeNET	Broad long bones	2/7	0.000970317	0.0167023	0	0	58.4029	405.193	COL1A1;GJA1	up	-1.77722
DisGeNET	Myocardial rupture	2/7	0.000970317	0.0167023	0	0	58.4029	405.193	THBS2;AGT	up	-1.77722
DisGeNET	Dissection, Blood Vessel	2/6	0.000696232	0.0136469	0	0	73.0074	530.751	COL1A1;AGT	up	-1.86496
DisGeNET	Keratitis-Ichthyosis-Deafness Syndrome	2/6	0.000696232	0.0136469	0	0	73.0074	530.751	GJA1;GJB6	up	-1.86496
DisGeNET	Pigment dispersion syndrome (disorder)	2/6	0.000696232	0.0136469	0	0	73.0074	530.751	GPNMB;PTGDS	up	-1.86496
DisGeNET	Syringomyelia	3/14	0.000110658	0.00386848	0	0	40.103	365.301	COL1A1;CD38;DDR2	up	-2.41246
DisGeNET	Cerebral Amyloid Angiopathy, Hereditary	3/13	8.73868e-05	0.00352772	0	0	44.1156	412.267	APOE;CD68;GFAP	up	-2.45251
DisGeNET	Axonal loss	3/11	5.09283e-05	0.00246711	0	0	55.15	545.163	TYROBP;INF2;TREM2	up	-2.60781
DisGeNET	Granular cell tumor	3/11	5.09283e-05	0.00246711	0	0	55.15	545.163	CASP3;SPP1;CD68	up	-2.60781
DisGeNET	Dementia of frontal lobe type	3/10	3.72268e-05	0.00195362	0	0	63.0317	642.828	TYROBP;TREM2;APOE	up	-2.70916
DisGeNET	Aneurysm, Dissecting	4/19	7.76005e-06	0.000797403	0	0	39.4965	464.737	COL1A1;CBS;APOE;AGT	up	-3.09832
DisGeNET	C1q DEFICIENCY	3/6	6.33144e-06	0.000670934	0	0	147.104	1760.83	C1QB;C1QA;C1QC	up	-3.17332
